# Supplementary material for: Nitrite reduction mediated by the complex RuIII(EDTA)
Source: Royal Society of Chemistry journal article supplement (doi:10.1039/c4dt01447b), 2014-07-21
Supplement: c4dt01447b1.pdf [file c4dt01447b1.pdf]

Electronic Supplementary Information (ESI)

## Nitrite reduction mediated by Ru<sup>III</sup>(edta) complex

Debabrata Chatterjee,\* Sanchari Shome, Namita Jaiswal and Priyabrata Banerjee

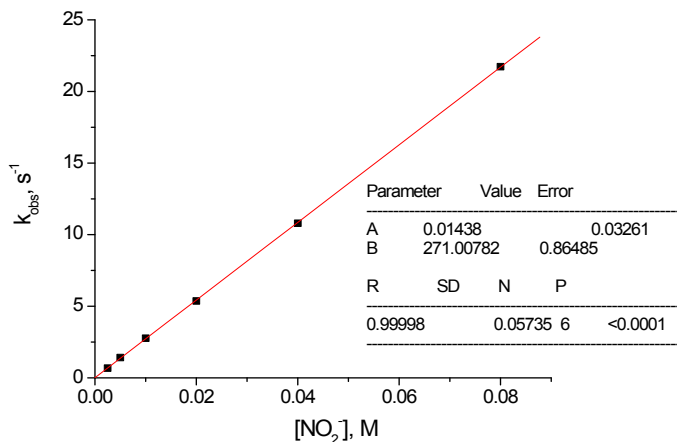

**Fig. S1** Plot of  $k_{\text{obs}}$  versus  $[\text{NO}_2^-]$  for the formation of  $[\text{Ru}^{\text{III}}(\text{edta})(\text{NO}_2)]^{2-}$  in the reaction of  $[\text{Ru}^{\text{III}}(\text{edta})(\text{H}_2\text{O})]^-$  with  $\text{NO}_2^-$  at 25 °C, pH = 4.5,  $[\text{Ru}^{\text{III}}] = 2 \times 10^{-4}$  M

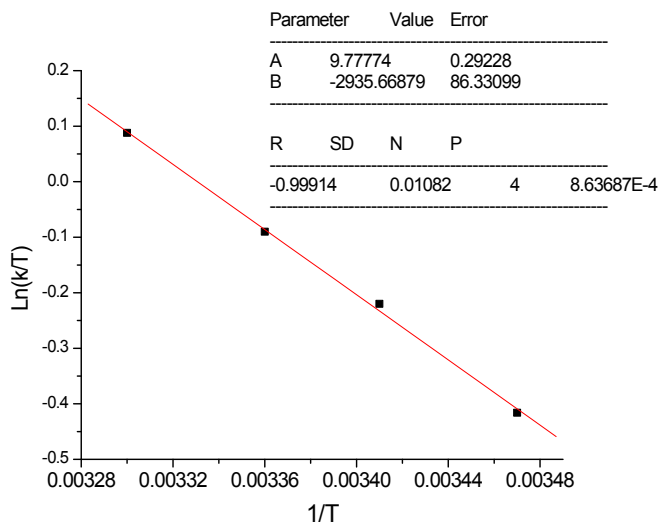

**Fig. S2** Eyring plot for the formation of  $[\text{Ru}^{\text{III}}(\text{edta})(\text{NO}_2)]^{2-}$  in the reaction of  $[\text{Ru}^{\text{III}}(\text{edta})(\text{H}_2\text{O})]^-$  with  $\text{NO}_2^-$  at 25 °C, pH = 4.5,  $[\text{Ru}^{\text{III}}] = 2 \times 10^{-4}$  M

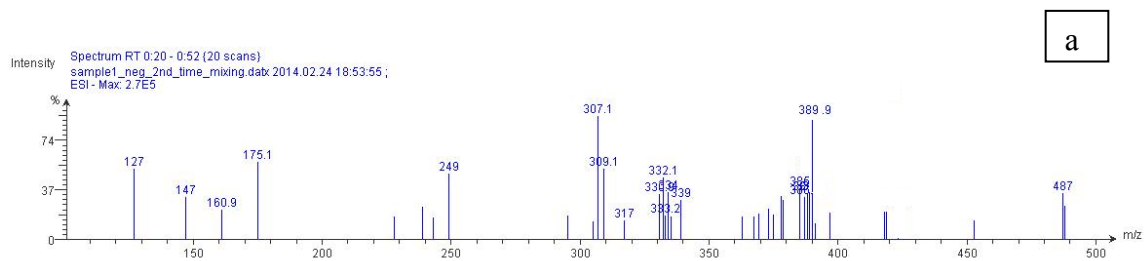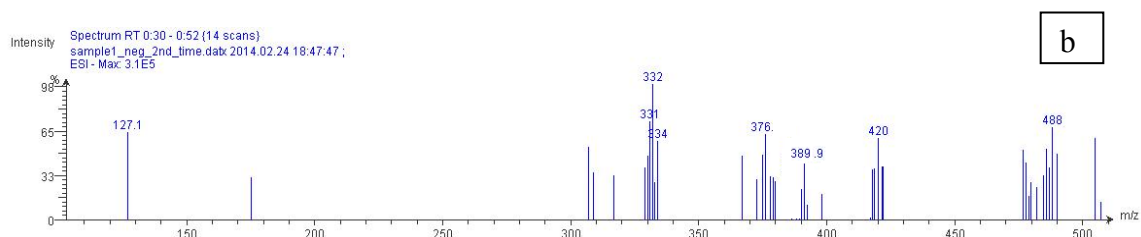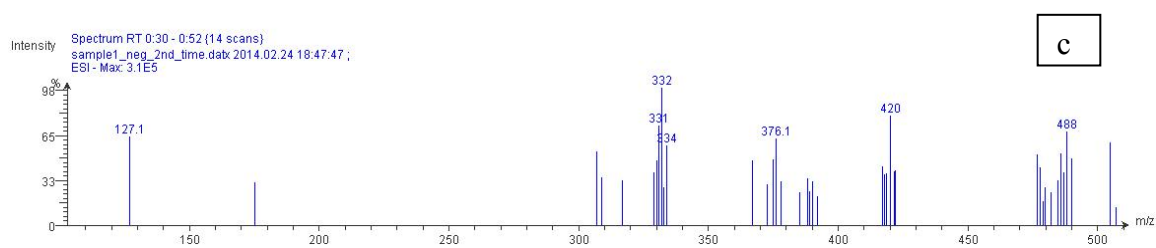

**Fig. S3** Summary of ESI-MS data: a) Spectrum recorded for the solution of  $[\text{Ru}^{\text{III}}(\text{edta})\text{H}_2\text{O}]^-$  ( $2 \times 10^{-4}$  M) containing nitrite ion ( $2 \times 10^{-3}$  M) in 0.01M acetate buffer at pH = 4.5; b) Spectrum recorded after 15 min; c) Spectrum recorded after 90 min of reaction.

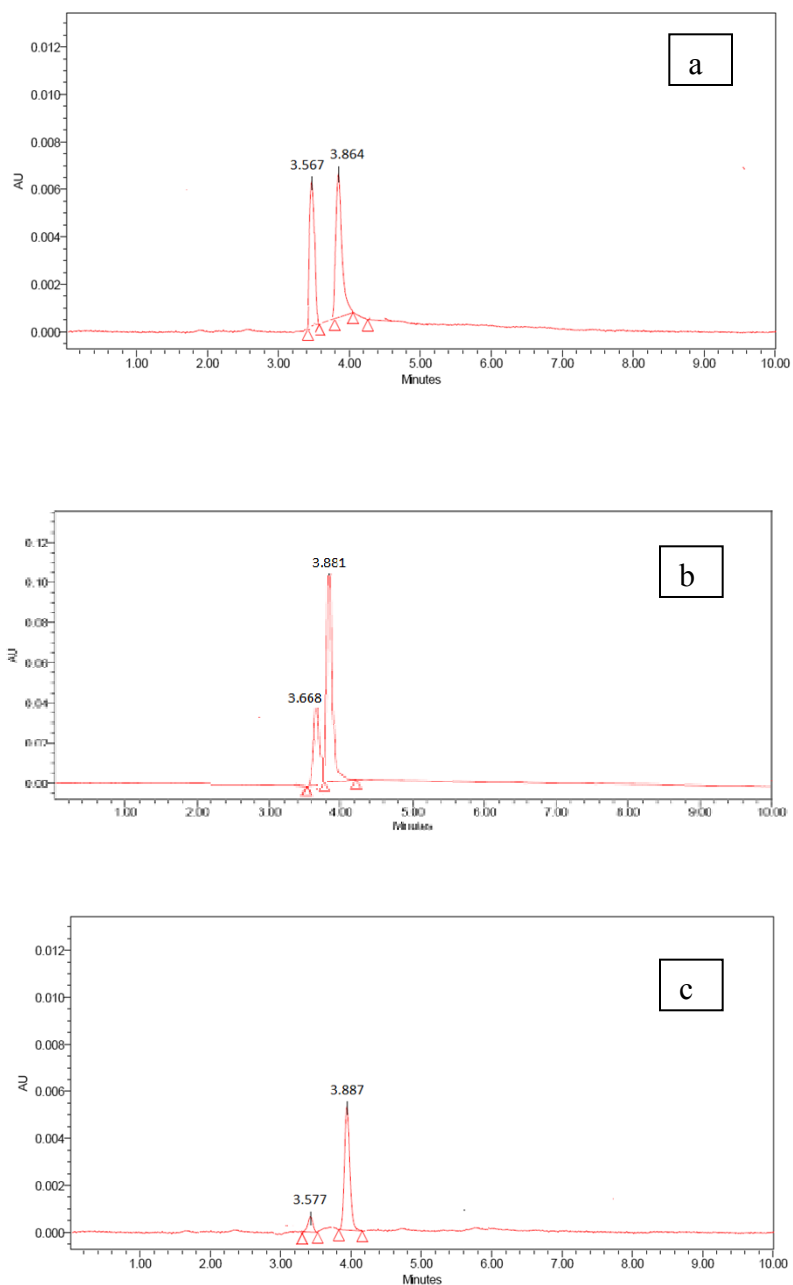

**Fig. S4** HPLC of (a) Solution mixture containing authentic samples of cysteine and cystine, (b) resultant solution that obtained after addition of cysteine to a solution of  $[\text{Ru}^{\text{III}}(\text{edta})(\text{NO}_2)]^{2-}$  at pH 6.5 and (c) resultant solution that obtained after addition of cysteine to a solution of  $[\text{Ru}^{\text{III}}(\text{edta})(\text{NO}_2)]^{2-}$  and dimedone ( $2 \times 10^{-3}$  M) at pH 6.5 . Experimental conditions as under Figure 5.

**RT of cystine (CysSSCys) and cysteine (CySH) are 3.6 and 3.8, respectively.**

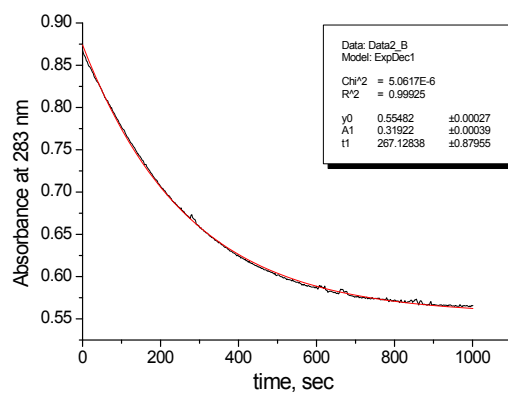

**Fig. S5** Time versus absorption (at 283 nm) trace recorded for the reaction of  $[\text{Ru}^{\text{III}}(\text{edta})(\text{NO}_2)]^{2-}$  (prepared by reacting  $[\text{Ru}^{\text{III}}(\text{edta})]$  complex with  $\text{NO}_2^-$ ) at pH 6.5 (0.01M phosphate buffer) with glutathione.  $[\text{Ru}^{\text{III}}] = 2 \times 10^{-4} \text{ M}$ ;  $[\text{NO}_2^-] = 2 \times 10^{-3} \text{ M}$ ,  $[\text{Glutathione}] = 2 \times 10^{-3} \text{ M}$ .
